# Supplementary material for: HapCUT2: robust and accurate haplotype assembly for diverse sequencing technologies
Source: PubMed Central journal article supplement — Genome Res. 2017 May;27(5):801–12. doi: 10.1101/gr.213462.116 (PMC5411775; doi:10.1101/gr.213462.116), 2017-05
Supplement: supp_gr.213462.116_Supplemental_Fig_S2.pdf [file supp_gr.213462.116_Supplemental_Fig_S2.pdf]

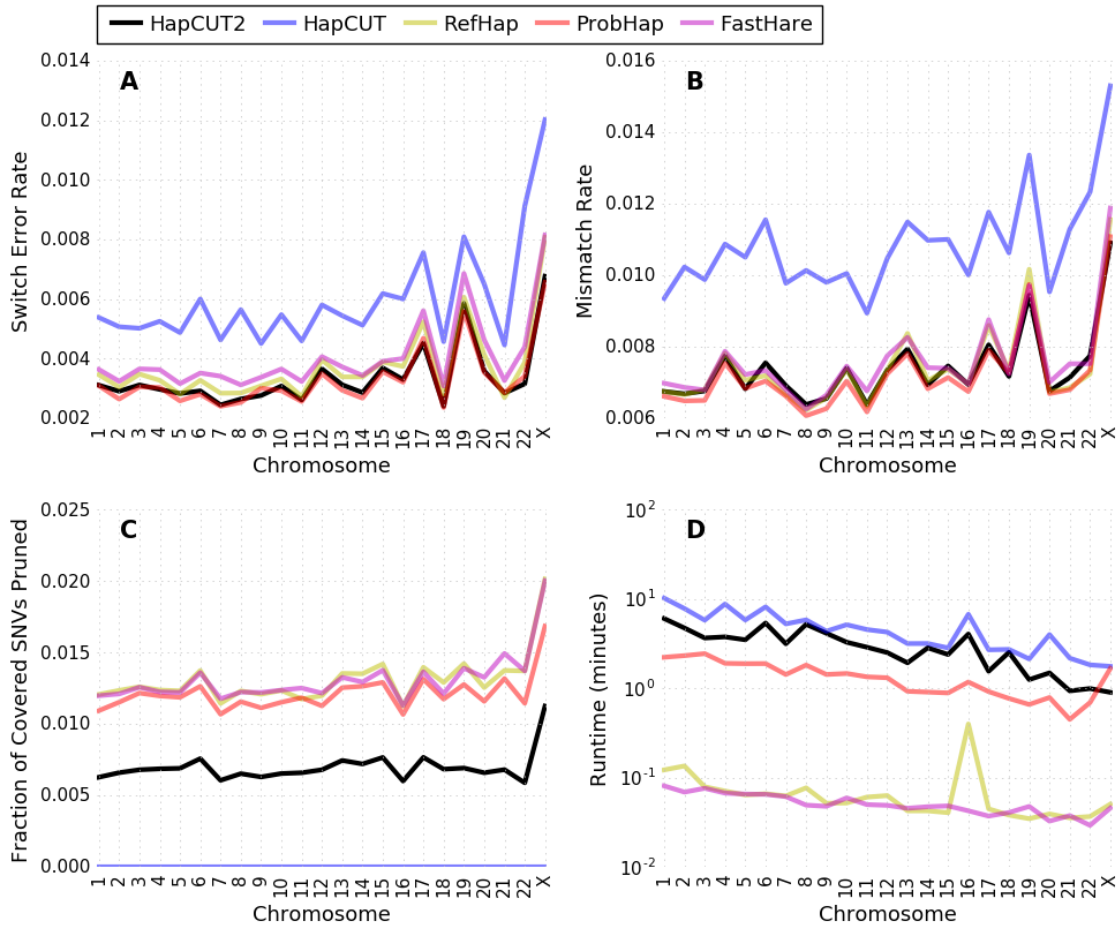

**Figure S2:** Comparison of the performance of HapCUT2 with other tools on NA12878 fosmid data across all chromosomes: (A) Switch error rate, (B) Mismatch rate, (C) Fraction of covered variants pruned, and (D) Runtime in CPU-minutes. Switch and mismatch errors were calculated using the set of phased variants specific to each tool.
