# Supplementary material for: HapCUT2: robust and accurate haplotype assembly for diverse sequencing technologies
Source: PubMed Central journal article supplement — Genome Res. 2017 May;27(5):801–12. doi: 10.1101/gr.213462.116 (PMC5411775; doi:10.1101/gr.213462.116), 2017-05
Supplement: supp_gr.213462.116_Supplemental_Fig_S4.pdf [file supp_gr.213462.116_Supplemental_Fig_S4.pdf]

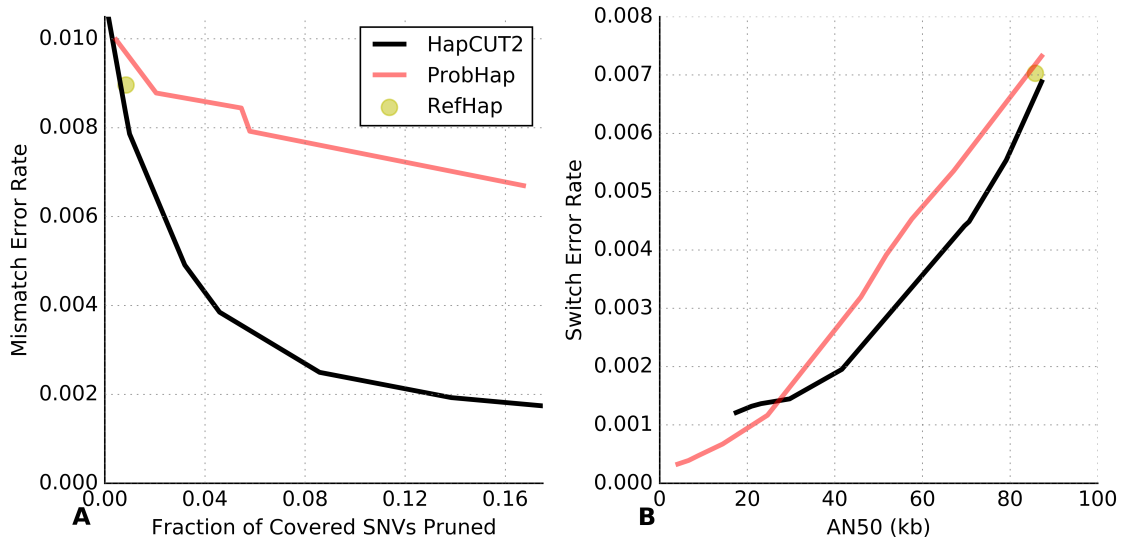

**Figure S4:** Efficacy of HapCUT2, ProbHap, and RefHaps' post-processing strategies on 11x coverage PacBio SMRT data. (A) Reduction in mismatch error rate by pruning individual low-confidence variants and (B) Reduction in switch error rate by splitting haplotype blocks at possible switch errors (block size represented by the AN50 metric). RefHap is presented as a single point since it does not support variant confidence thresholding or block-splitting.
