# Supplementary material for: HapCUT2: robust and accurate haplotype assembly for diverse sequencing technologies
Source: PubMed Central journal article supplement — Genome Res. 2017 May;27(5):801–12. doi: 10.1101/gr.213462.116 (PMC5411775; doi:10.1101/gr.213462.116), 2017-05
Supplement: supp_gr.213462.116_Supplemental_Fig_S5.pdf [file supp_gr.213462.116_Supplemental_Fig_S5.pdf]

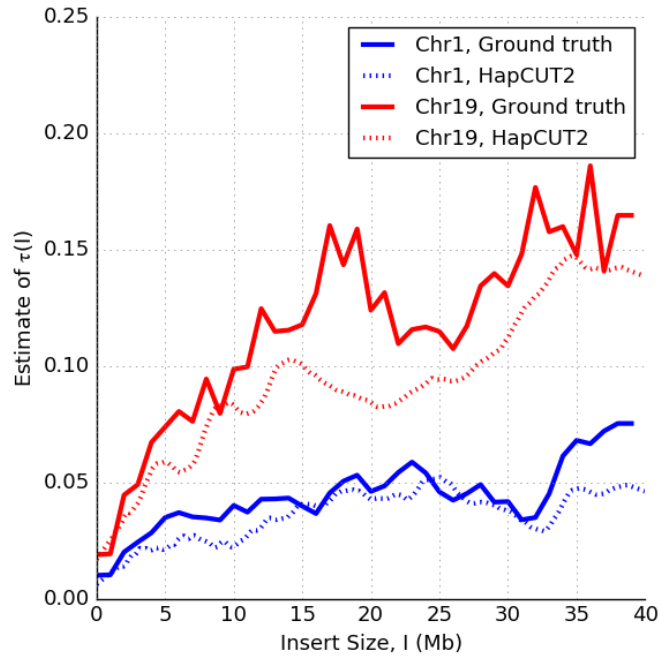

**Figure S5:** Comparison of the h-trans interaction probabilities  $\tau(I)$  estimated by HapCUT2 (for chromosomes 1 and 19 of NA12878 using  $90\times$  Hi-C data) against probabilities estimated using knowledge of ground truth haplotypes on the same dataset. Raw HapCUT2 probabilities are smoothed with a Savitzky-Golay filter for visualization, and ground truth probabilities are created using 1 Mb bins.
