# Supplementary material for: HapCUT2: robust and accurate haplotype assembly for diverse sequencing technologies
Source: PubMed Central journal article supplement — Genome Res. 2017 May;27(5):801–12. doi: 10.1101/gr.213462.116 (PMC5411775; doi:10.1101/gr.213462.116), 2017-05
Supplement: supp_gr.213462.116_Supplemental_Fig_S6.pdf [file supp_gr.213462.116_Supplemental_Fig_S6.pdf]

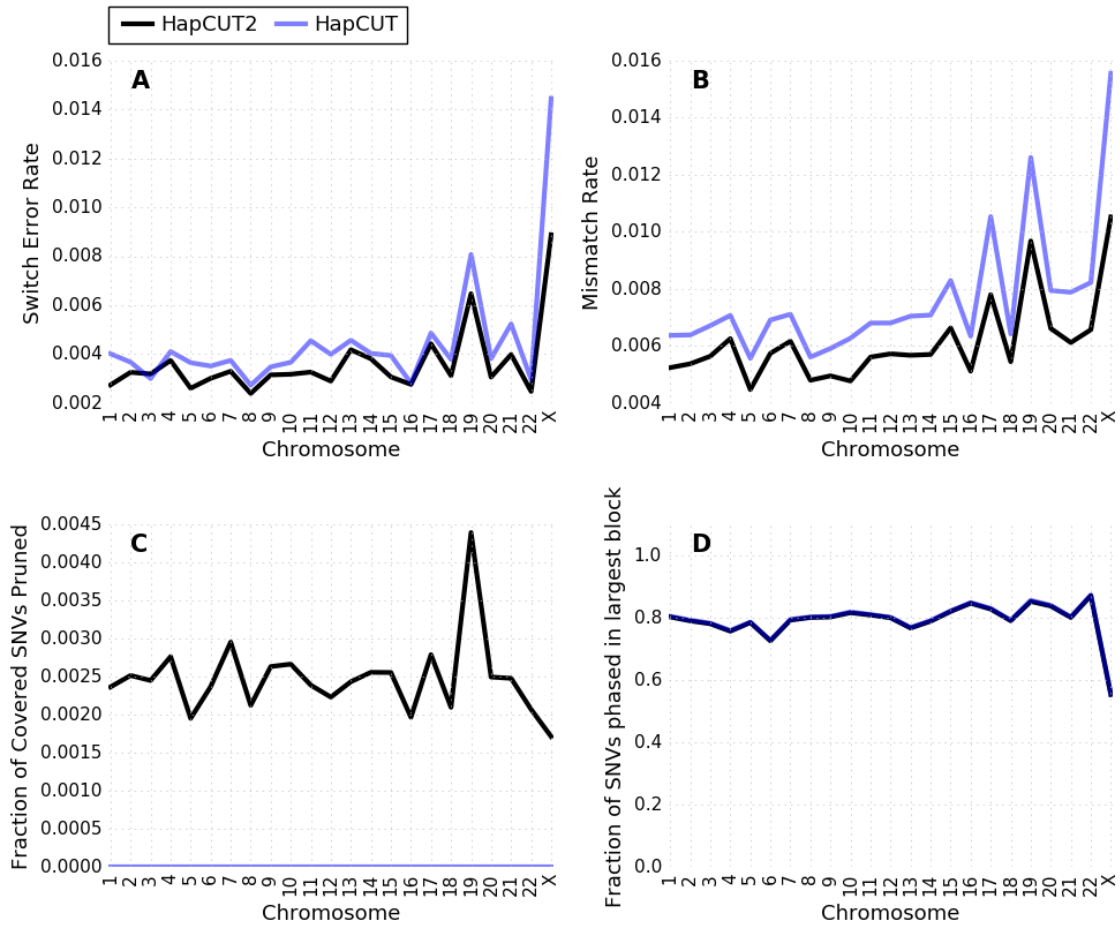

**Figure S6:** Comparison of HapCUT2 to HapCUT on 90 $\times$  coverage MboI Hi-C data. (A) Switch error rate (B) Mismatch rate (C) Fraction of covered variants pruned (D) Fraction of variants phased in largest block. Switch and mismatch errors reported here are for all variants phased by a given tool, so the fraction of variants pruned is also reported.
