# Supplementary material for: HapCUT2: robust and accurate haplotype assembly for diverse sequencing technologies
Source: PubMed Central journal article supplement — Genome Res. 2017 May;27(5):801–12. doi: 10.1101/gr.213462.116 (PMC5411775; doi:10.1101/gr.213462.116), 2017-05
Supplement: supp_gr.213462.116_Supplemental_Fig_S7.pdf [file supp_gr.213462.116_Supplemental_Fig_S7.pdf]

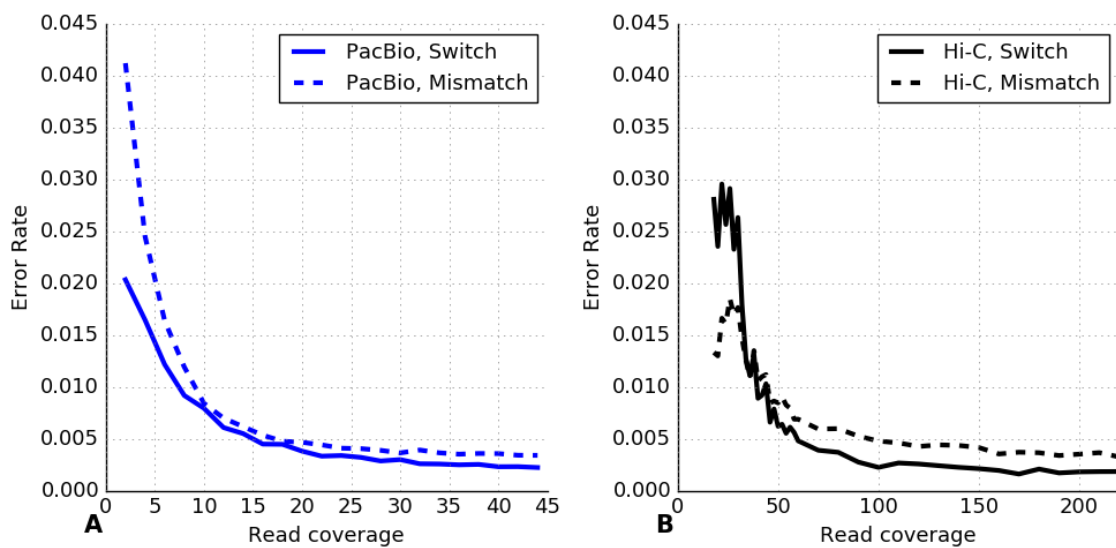

**Figure S7:** Haplotype accuracy (switch and mismatch error rates) for the NA12878 genome as a function of sequence coverage for (A) PacBio SMRT data and (B) Hi-C (MboI enzyme) data.
