# Supplementary material for: HapCUT2: robust and accurate haplotype assembly for diverse sequencing technologies
Source: PubMed Central journal article supplement — Genome Res. 2017 May;27(5):801–12. doi: 10.1101/gr.213462.116 (PMC5411775; doi:10.1101/gr.213462.116), 2017-05
Supplement: supp_gr.213462.116_Supplemental_Fig_S8.pdf [file supp_gr.213462.116_Supplemental_Fig_S8.pdf]

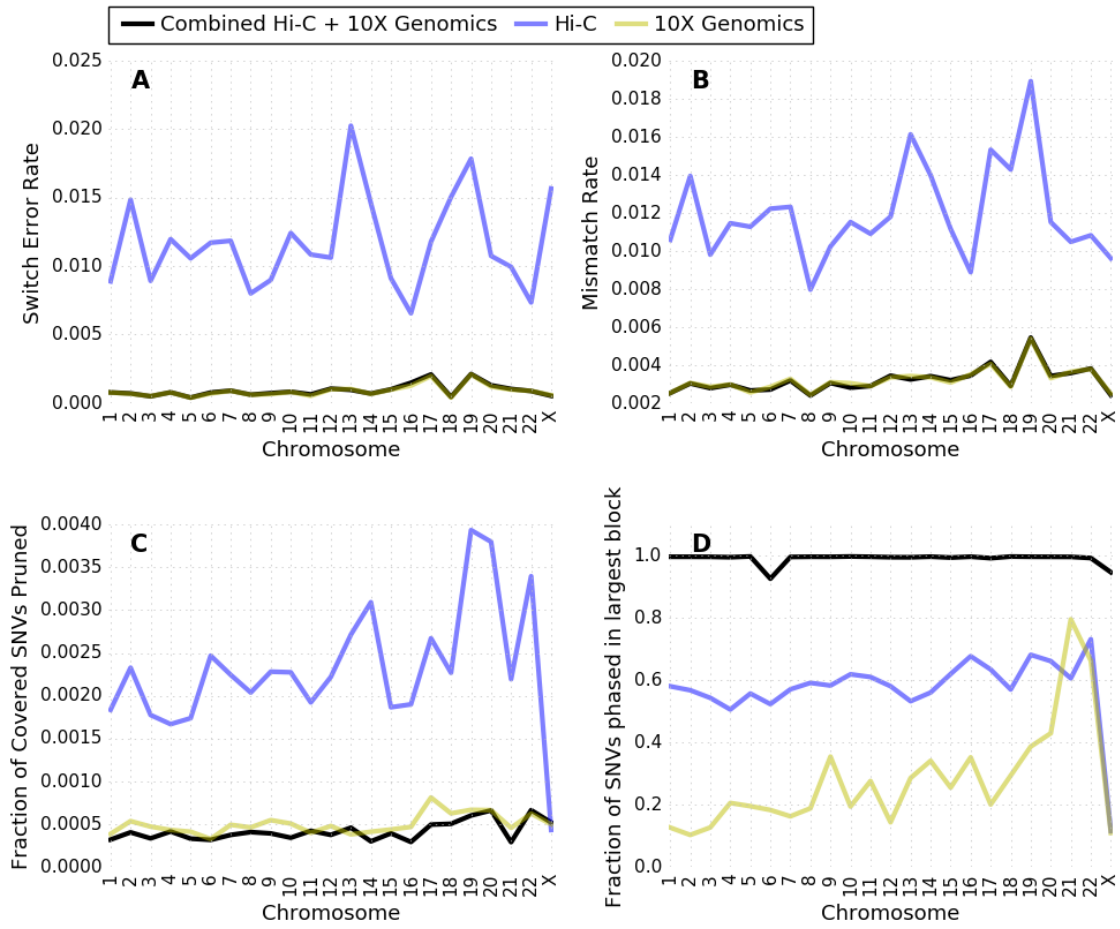

**Figure S9:** Comparison of haplotypes obtained using HapCUT2 on 40x coverage MboI Hi-C reads combined with 10X Genomics linked-reads (34x short-read coverage) to the haplotypes obtained using the two datasets separately: (A) Switch error rate, (B) Mismatch rate, (C) Fraction of covered variants pruned, and (D) Fraction of variants phased in largest block.
