# Supplementary material for: HapCUT2: robust and accurate haplotype assembly for diverse sequencing technologies
Source: PubMed Central journal article supplement — Genome Res. 2017 May;27(5):801–12. doi: 10.1101/gr.213462.116 (PMC5411775; doi:10.1101/gr.213462.116), 2017-05
Supplement: supp_gr.213462.116_Supplemental_Table_S1.pdf [file supp_gr.213462.116_Supplemental_Table_S1.pdf]

**Table S1:** Comparison of the total runtime to phase whole-genome Hi-C data (format in hours:minutes) using HapCUT and HapCUT2. To assess the impact of the trans-error probability ( $\tau$ ) modeling on run time, HapCUT2 was run in three different ways: default (no trans-error modeling), Hi-C mode with a pre-computed  $\tau$  model and Hi-C mode that estimates  $\tau$  from the data.

| <b>Method</b>                       | <b>Hi-C (30×)</b> | <b>Hi-C (40×)</b> | <b>Hi-C (90×)</b> |
|-------------------------------------|-------------------|-------------------|-------------------|
| HapCUT                              | 0:36              | 0:46              | 1:49              |
| HapCUT2 (no trans-errors)           | 0:10              | 0:15              | 0:34              |
| HapCUT2 (fixed $\tau$ model)        | 0:34              | 0:52              | 2:02              |
| HapCUT2 (estimate $\tau$ from data) | 3:05              | 4:38              | 9:11              |
